# Supplementary material
Source: ML conference proceedings conference paper supplement (https://openreview.net/forum?id=4S8agvKjle)
Supplement: supplementary_material [file attachment]

# AgentBoard

---

AgentBoard emphasizes **analytical evaluation** for Large Language Models (LLMs) as generalist agents to perceive and act within various environments. It outlines four principles for constructing a benchmark to evaluate LLMs as generalist agents:

1. **Task Diversity:** AgentBoard incorporates 9 distinct tasks to comprehensively understand the generalist ability of LLM agents, which is built upon LLM's extensive knowledge base and exceptional scenario comprehension.
2. **Multi-round Intercation:** AgentBoard provides multi-round interaction between agents and environment, which is necessary to reflect the evolutionary nature of human intelligence, which continuously receives information and adapts towards the environment.
3. **Partially-Observable Environments:** In AgentBoard, the complete state of the environment is not available to the agent, which assesses agent world modeling ability as additional knowledge needs to be acquired through online exploration.
4. **Analytical Evaluation:** AgentBoard is a systematic evaluation platform: it includes a user-friendly script to construct goal-oriented reflex agents for a range of models, and features a panel for visualizing and interpreting results across multiple dimensions of agent proficiency, including *fine-grained progress rates, grounding accuracy, performance breakdown for hard and easy examples, long-range in- teractions, detailed performance across various sub-skills, and trajectory with friendly visualization*

## Dataset Link

---

[Github Repo](#)

[Official Website](#)

[Huggingface Dataset](#)

## Data Card Author(s)

---

Chang Ma

## Dataset Owners

---

### Team(s)

AgentBoard Team

### Contact Detail(s)

**Affiliation:** The Hong Kong University of Science and Technology

**Group Email:** [llagentboard@gmail.com](mailto:llagentboard@gmail.com)

**Website:** <https://hkust-nlp.github.io/agentboard/>

## Authors:

Chang Ma, Junlei Zhang, Zhihao Zhu, Cheng Yang, Yujiu Yang, Yaohui Jin, Zhenzhong Lan, Lingpeng Kong, Junxian He

## Funding Sources

---

### Institution(s)

The Hong Kong University of Science and Technology

### Funding or Grant Summary(ies)

N/A

## Dataset Overview

---

### Data Subject(s)

- Subgoal annotation for agent tasks
- test data for all tasks

### Data Snapshots

| Category                    | Data   |
|-----------------------------|--------|
| Size of Dataset             | 5.7 GB |
| Number of Instances         | 1012   |
| Number of Fields            | 6      |
| Labeled Classes             | N/A    |
| Number of Labels            | N/A    |
| Average Labels Per Instance | N/A    |
| Algorithmic Labels          | N/A    |

### Content Description

Each datapoint in the dataset contains one goal with corresponding subgoals as well as labeled difficulty. We keep all labels public to enhance open study on our benchmark.

### Sensitivity of Data

---

No

# Dataset Version and Maintenance Maintenance Status

---

**Actively Maintained** - No new versions will be made available, but this dataset will be actively maintained, including but not limited to updates to the data.

**Version Details Current Version:** 1.0

**Last Updated:** 02/2023

**Release Date:** 02/2023

**Maintenance Plan:** We will fix any error and provide help in github issues.

**Versioning:** N/A. AgentBoard is a static dataset. Minor releases correspond to any errors fixed in the dataset.

**Feedback:** For feedback, reach out to [llagentboard@gmail.com](mailto:llagentboard@gmail.com) or open an issue on our Github Repo

## Example of Data Points

---

### Primary Data Modality

Text Data

### Sampling of Data Points

Explore AgentBoard on our official website.

### Data Fields

| Fields          | Description                                                                        |
|-----------------|------------------------------------------------------------------------------------|
| Task            | Name of the task for the problem.                                                  |
| ID              | ID of the problem in the task.                                                     |
| Goal            | Goal for the agent task.                                                           |
| Subgoals        | Decomposed subgoals, used in progress rate calculation.                            |
| Difficulty      | Annotated difficulty level, used in easy/hard metrics calculation.                 |
| Additional Info | Other additional information, including descriptions or original ID for each task. |

## Typical Data Point

Below is an example from PDDL:

```
{
  "id": 0,
  "task": "pddl",
  "goal": "The goal is to satisfy the following conditions: ball1 is at roomb. ball2 is at roomb. ball3 is at roomb. ball4 is at roomb. ",
  "subgoals": [
    "ball1 is at roomb.",
    "ball2 is at roomb.",
    "ball3 is at roomb.",
    "ball4 is at roomb."
  ],
  "difficulty": "easy",
  "additional_info": {
    "subtask": "gripper"
  }
}
```

## Atypical Data Point

---

The dataset does not contain atypical data points as far as we know.

## Motivations & Intentions

---

### Purpose(s)

Research

### Domain(s) of Application

Machine Learning, Natural Language Processing, Autonomous Agent

### Motivating Factor(s)

- Provide **analytical evaluation** for Large Language Models (LLMs) as generalist agents to perceive and act within various environments.
- Perform fine-grained evaluation and distinguish any minor improvement in open-source LLMs.

## Intended Use

---

### Dataset Use(s)

Safe for research use

### Suitable Use Case(s)

Search for better hyperparameter and datasets during LLM training. For example, determine the optimal training strategy for an agent LLM.

Assess agentic abilities of LLMs.

### Unsuitable Use Case(s)

The dataset is created for model evaluation. It is not intended to be used as pre-training data.

## Citation Guidelines

---

### BiBTeX:

```
@misc{ma2024agentboard,
  title={AgentBoard: An Analytical Evaluation Board of Multi-turn LLM Agents},
  author={Chang Ma and Junlei Zhang and Zhihao Zhu and Cheng Yang and Yujiu Yang and Yaohui Jin and Zhenzhong Lan and Lingpeng Kong and Junxian He},
  year={2024},
  eprint={2401.13178},
  archivePrefix={arXiv},
  primaryClass={cs.CL}
}
```

## Provenance

---

### Collection Method(s) Used

- Manually annotated
- Adapted from other environments.

### Source Description(s)

We adapt from sources including:

- [Alfworld](#)
- [BabyAI](#)
- [Jericho](#)
- [PDDL Gym](#)
- [Scienceworld](#)
- [Webshop](#)
- [Webareana](#)

### Data Processing

- We make sure all environments have a text-based interaction interface.
- We manually annotate subgoals for each task, and verify the subgoals through a strict process.

## Use in ML or AI Systems Dataset Use(s)

---

Testing

Validation

Development or Production Use

## Usage Guideline(s)

---

Please visit our [Github Repo](#) for detailed information.

## Licenses

---

Code License Apache-2.0

The AgentBoard codebase is licensed under a [Apache-2.0 License](#).
